# Supplementary figures and images for: A critical role for mTORC1 in erythropoiesis and anemia
Source: eLife journal article supplement (doi:10.7554/elife.01913), 2014-09-08

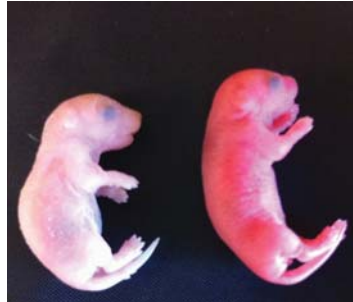

$\Delta$   
Vav<sup>Cre</sup>  
Raptor<sup>fl/fl</sup>      Raptor<sup>fl/fl</sup>

Figure 4 - figure supplement 1

Supplement: supp [file elife-01913-supp-v1.zip]

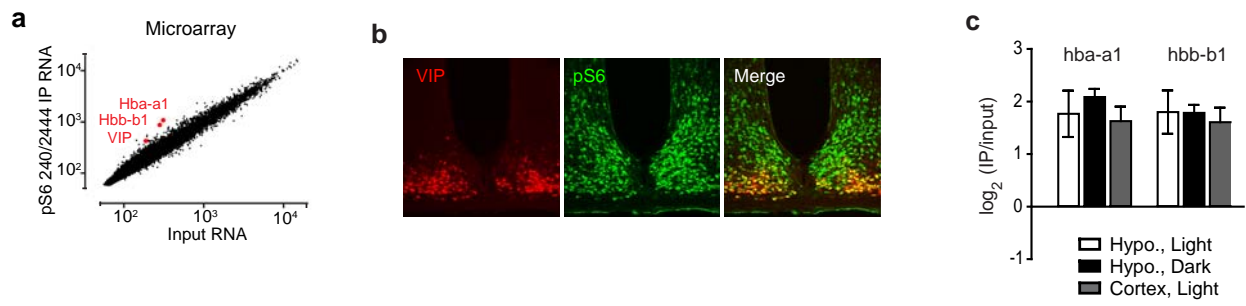

Figure 1 - figure supplement 1

Supplement: supp [file elife-01913-supp-v1.zip]

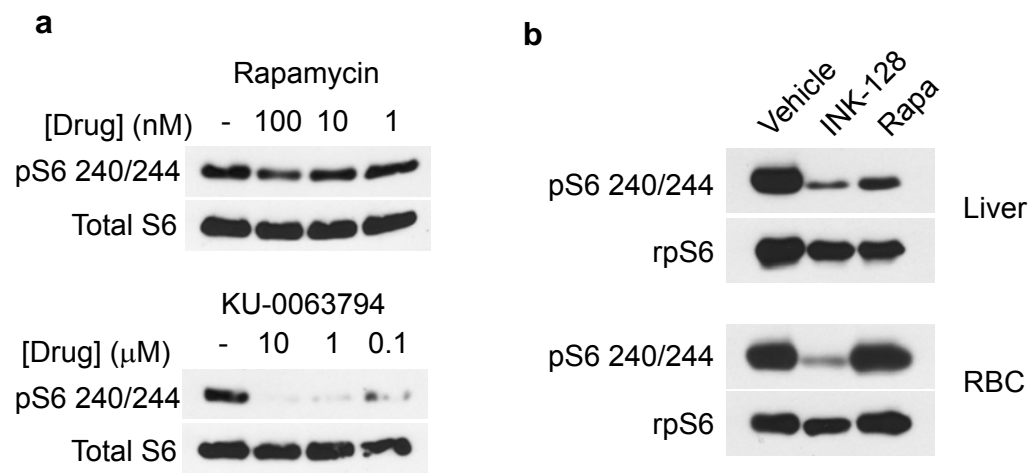

Figure 5 - figure supplement 1

Supplement: supp [file elife-01913-supp-v1.zip]
